# Supplementary material for: Delineating effect of cationic head group and preparation method on transfection versus toxicity of lipid-based nanoparticles for gene delivery
Source: Research Square preprint supplement (doi:10.21203/rs.3.rs-2649244/v1), 2023-03-29
Supplement: Supplementary file 1 [file 1711e546d4c35d78805e8702.xlsx]

## Sheet: Sheet1
					Table 4. Physicochemical characterization of cationic/ionizable lipoplexes at N/P weight ratio of 5
				Cationic/Ionizable Lipoplexes	Particle size	Polydispersity Index
					(nm)	(PDI)
				DLinDMA	185.40 ± 6.99	0.29
				DLin-MC3-DMA	169.10 ± 2.17	0.285
				SM-102	123.72 ± 1.82	0.257
				LAE	203.54 ± 5.95	0.292
				DOTAP	188.82 ± 5.84	0.288
