# Supplementary material for: Delineating effect of cationic head group and preparation method on transfection versus toxicity of lipid-based nanoparticles for gene delivery
Source: Research Square preprint supplement (doi:10.21203/rs.3.rs-2649244/v1), 2023-03-29
Supplement: Supplementary file 2 [file 2c0f6c1736a989aa3a096200.xlsx]

## Sheet: Sheet1
					Table 3. Surface charge of cationic/ionizable liposomes at different pH conditions
				Cationic/Ionizable Liposomes	Zeta Potential at pH 5.5	Zeta Potential at pH 7.4
					(mV)	(mV)
				DLinDMA	+ 39.02 ± 3.97	+ 6.93 ± 0.84
				DLin-MC3-DMA	+ 37.95 ± 1.22	+ 4.75 ± 0.45
				SM-102	+ 40.89 ± 3.81	+ 5.86 ± 0.63
				LAE	+ 34.02 ± 2.21	+ 35.42 ± 2.89
				DOTAP	+ 32.47 ± 1.95	+ 31.92 ± 3.07
