# Supplementary material for: Delineating effect of cationic head group and preparation method on transfection versus toxicity of lipid-based nanoparticles for gene delivery
Source: Research Square preprint supplement (doi:10.21203/rs.3.rs-2649244/v1), 2023-03-29
Supplement: Supplementary file 3 [file 3841191715c645dfbab45b1a.xlsx]

## Sheet: Sheet1
					Table 1. Lipid composition of cationic/ionizable liposomal formulations
				Type of Lipid	Lipid used	Molar Concentration
						(mM)
				Cationic/Ionizable Lipid or Surfactant	DLinDMA
					DLin-MC3-DMA
					SM-102	16.2
					LAE
					DOTAP
				Phospholipids	DOPC	67
					DOPE	8
				Sterol	Cholesterol	8
				PEGylated Lipid	DSPE-PEG2000	0.8
