# Supplementary material for: Delineating effect of cationic head group and preparation method on transfection versus toxicity of lipid-based nanoparticles for gene delivery
Source: Research Square preprint supplement (doi:10.21203/rs.3.rs-2649244/v1), 2023-03-29
Supplement: Supplementary file 4 [file 6702da1742c8c5fe74b2e6ba.xlsx]

## Sheet: Sheet1
						Table 6. Physicochemical characterization of G-LNPs prepared by microfluidic mixing following dialysis against PBS pH 7.4
				LNPs	N/P Ratio	Particle Size	Polydispersity Index	Zeta Potential	Entrapment efficiency (%)
				(GFP-pDNA – µg/mL)	(Weight ratio)	(nm)		(mV)
				G-LNP-200	15	139.0 ± 15.5	0.289 ± 0.079	+ 14.8 ± 1.4	90.88 ± 2.7
				G-LNP-100	30	125.3 ± 4.8	0.251 ± 0.052	+ 17.3 ± 2.5	94.56 ± 1.5
				G-LNP-75	40	107.9 ± 10.2	0.209 ± 0.010	+ 15.6 ± 1.7	98.48 ± 0.8
				G-LNP-50	60	90.15 ± 4.7	0.133 ± 0.014	+ 19.6 ± 1.5	99.89 ± 0.1
