# Supplementary material for: Delineating effect of cationic head group and preparation method on transfection versus toxicity of lipid-based nanoparticles for gene delivery
Source: Research Square preprint supplement (doi:10.21203/rs.3.rs-2649244/v1), 2023-03-29
Supplement: Supplementary file 5 [file 74fb7711b1e6bc753bcbbea5.xlsx]

## Sheet: Sheet1
					Table 2. Physicochemical characterization of cationic/ionizable liposomes
				Cationic/Ionizable Liposomes	Particle size	Polydispersity Index	Zeta Potential
					(nm)	(PDI)	(mV)
				DLinDMA	120.10 ± 5.84	0.203	+ 36.50 ± 1.47
				DLin-MC3-DMA	116.70 ± 3.25	0.21	+ 35.90 ± 1.22
				SM-102	103.90 ± 4.97	0.177	+ 40.20 ± 4.88
				LAE	107.20 ± 4.95	0.205	+ 34.40 ± 2.87
				DOTAP	80.09 ± 5.84	0.192	+ 38.90 ± 3.68
