# Supplementary material for: Delineating effect of cationic head group and preparation method on transfection versus toxicity of lipid-based nanoparticles for gene delivery
Source: Research Square preprint supplement (doi:10.21203/rs.3.rs-2649244/v1), 2023-03-29
Supplement: Supplementary file 6 [file d68bf30a6f32d319cb2260a7.xlsx]

## Sheet: Sheet1
					Table 5. IC50 and IC90 values of cationic/ionizable liposomes in A375V cells as determined by MTT assay
				Cationic/Ionizable Liposomes	IC50	IC90
					(µM)	(µM)
				DLinDMA	126.7 ± 20.3	1138.5 ± 208.3
				DLin-MC3-DMA	96.5 ± 13.6	870.3 ± 102.5
				SM-102	>200	>1800
				LAE	24.5 ± 1.6	220.5 ± 42.1
				DOTAP	19.7 ± 2.5	177.3 ± 36.9
